# Supplementary material for: Aluminium-based ionic liquid grafted on biochar as a heterogeneous catalyst for the selective synthesis of tetrazole and 2,3-dihydroquinazolin 4(1 H )-one derivatives
Source: Royal Society of Chemistry journal article supplement (doi:10.1039/d3ra06440a), 2023-01-01
Supplement: d3ra06440a1.pdf [file d3ra06440a1.pdf]

**Aluminium-based ionic liquid grafted on biochar as a heterogeneous catalyst for the selective synthesis of tetrazole and 2,3-dihydroquinazolin 4(1H)-one derivatives**

**Masoomeh Norouzi\*<sup>a</sup>, Parisa Moradi<sup>a</sup>, Maryam Khanmoradi<sup>a</sup>**

*<sup>a</sup>Department of Chemistry, Faculty of Science, Ilam University, P. O. Box69315516, Ilam, Iran.*

*\* E-mail address: [m.norouzi@ilam.ac.ir](mailto:m.norouzi@ilam.ac.ir)*

**Data of compounds**

**Figure S1.** <sup>1</sup>HNMR spectrum of 5-(4-Chloro-phenyl)-1H-tetrazole

**Figure S2.** <sup>1</sup>HNMR spectrum of 5-Phenyltetrazole

**Figure S3.** <sup>1</sup>HNMR spectrum of 5-(3-Nitrophenyl) tetrazole

**Figure S4.** <sup>1</sup>HNMR spectrum of 2-(4-Bromo-phenyl)-2,3-dihydro-1H-quinazolin-4-one

**Figure S5.** <sup>1</sup>HNMR spectrum of 2-(5-Bromo-2-hydroxy-phenyl)-2,3-dihydro-1H-quinazolin-4-one

**Figure S6.** <sup>1</sup>HNMR spectrum of 2-(3,4-Dimethoxy-phenyl)-2,3-dihydro-1H-quinazolin-4-one

**Figure S7.** <sup>1</sup>HNMR spectrum of 2-Phenyl-2,3-dihydro-1H-quinazolin-4-one

**Figure S8.** <sup>1</sup>HNMR spectrum of 2-(4-Chloro-phenyl)-2,3-dihydro-1H-quinazolin-4-one

## 5-(4-Chloro-phenyl)-1H-tetrazole

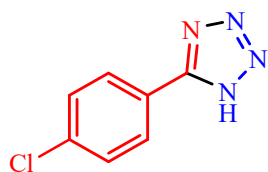

$^1\text{H NMR}$  (400 MHz, DMSO)  $\delta$ : 16.97 (s, 1H, NH), 8.06-8.03 (d, 1H, J=8 Hz, CH), 7.72-7.67 (d, 1H, J=8 Hz, Ar-H).

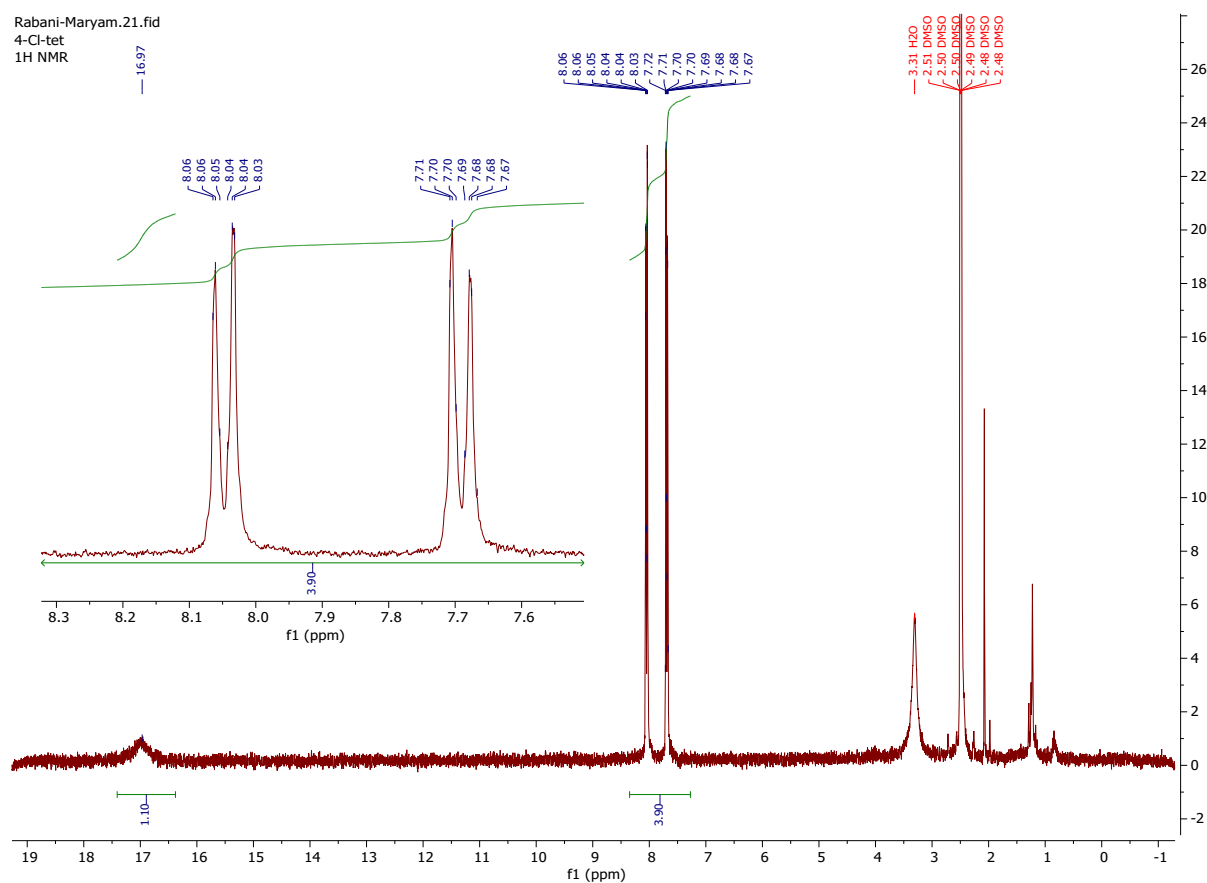

**Figure S1.**  $^1\text{H NMR}$  spectrum of 5-(4-Chloro-phenyl)-1H-tetrazole

## 5-Phenyltetrazole

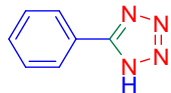

$^1\text{H}$  NMR (400 MHz, DMSO)  $\delta$ : 8.10-8.05 (t,  $J = 8$  Hz, 2H), 7.94-7.86 (t,  $J = 8$  Hz, 1H), 7.80-7.74 (t,  $J = 8$  Hz, 2H).

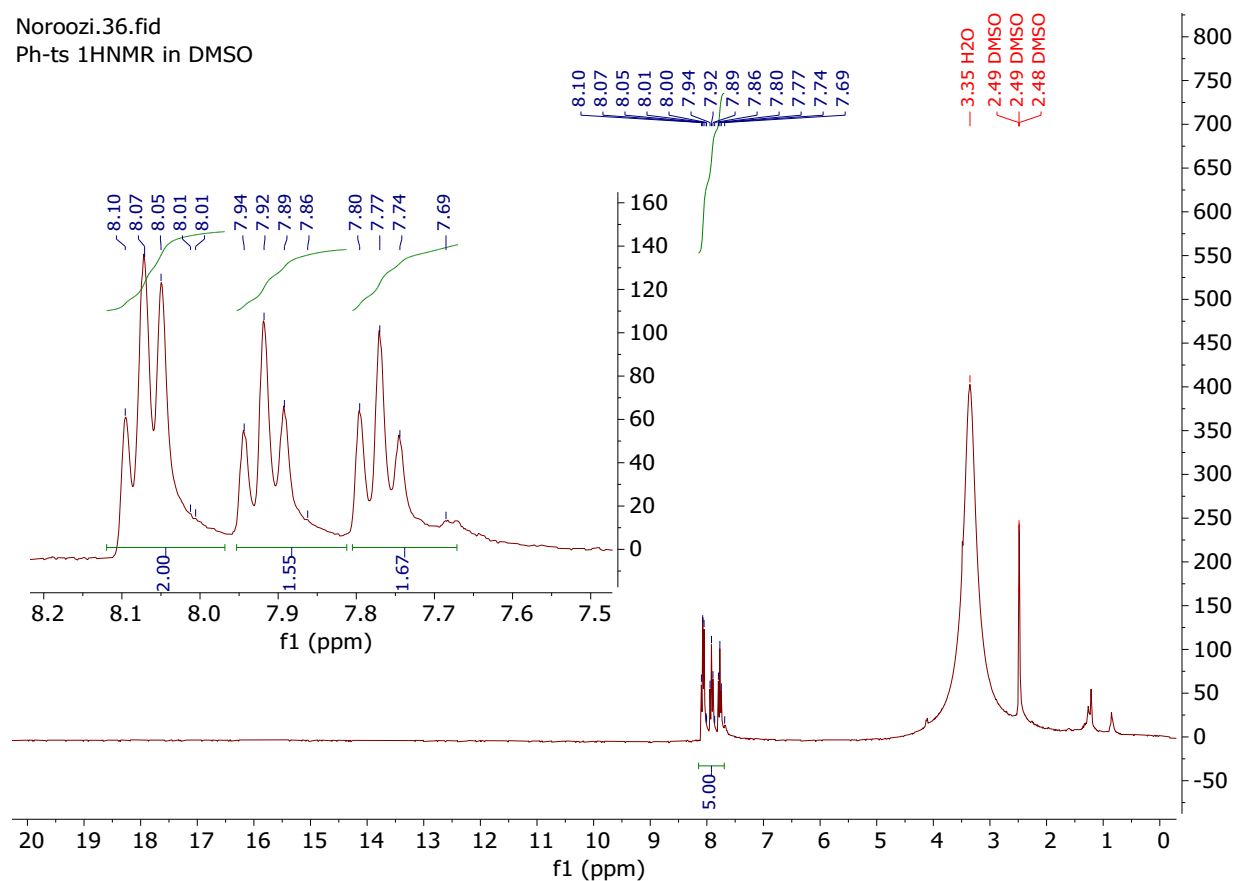

**Figure S2.**  $^1\text{H}$ NMR spectrum of 5-Phenyltetrazole

### 5-(3-Nitrophenyl)tetrazole

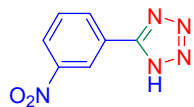

$^1\text{H NMR}$  (400 MHz, DMSO)  $\delta$ : 8.82 (s, 1H), 8.54 – 8.34 (m, 2H), 7.92-7.86 (t,  $J = 8$ . Hz, 1H).

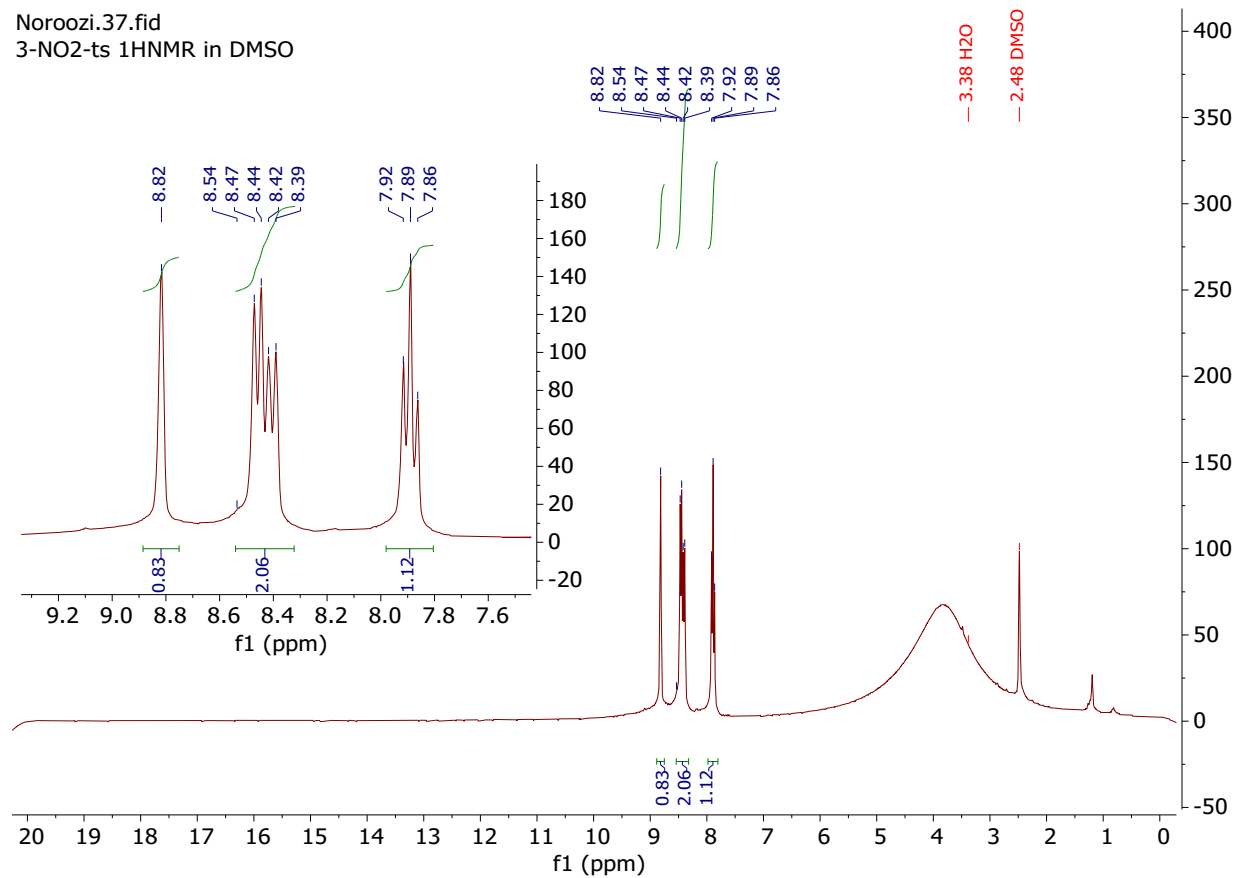

**Figure S3.**  $^1\text{H NMR}$  spectrum of 5-(3-Nitrophenyl)tetrazole

## 2-(4-Bromo-phenyl)-2,3-dihydro-1H-quinazolin-4-one

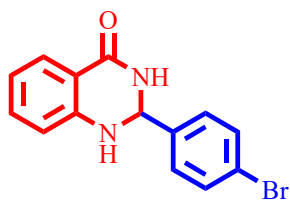

$^1\text{H NMR}$  (400 MHz,  $\text{DMSO-}d_6$ ):  $\delta$  8.31 (s, 1H), 7.60-7.56 (d,  $J=7.6$  Hz, 3H), 7.44-7.41 (d,  $J=7.4$  Hz, 2H), 7.26-7.21 (s,  $J=7$  Hz, 1H), 7.13 (s, 1H), 6.75-6.4 (m, 2H), 5.74 (s, 1H) ppm.

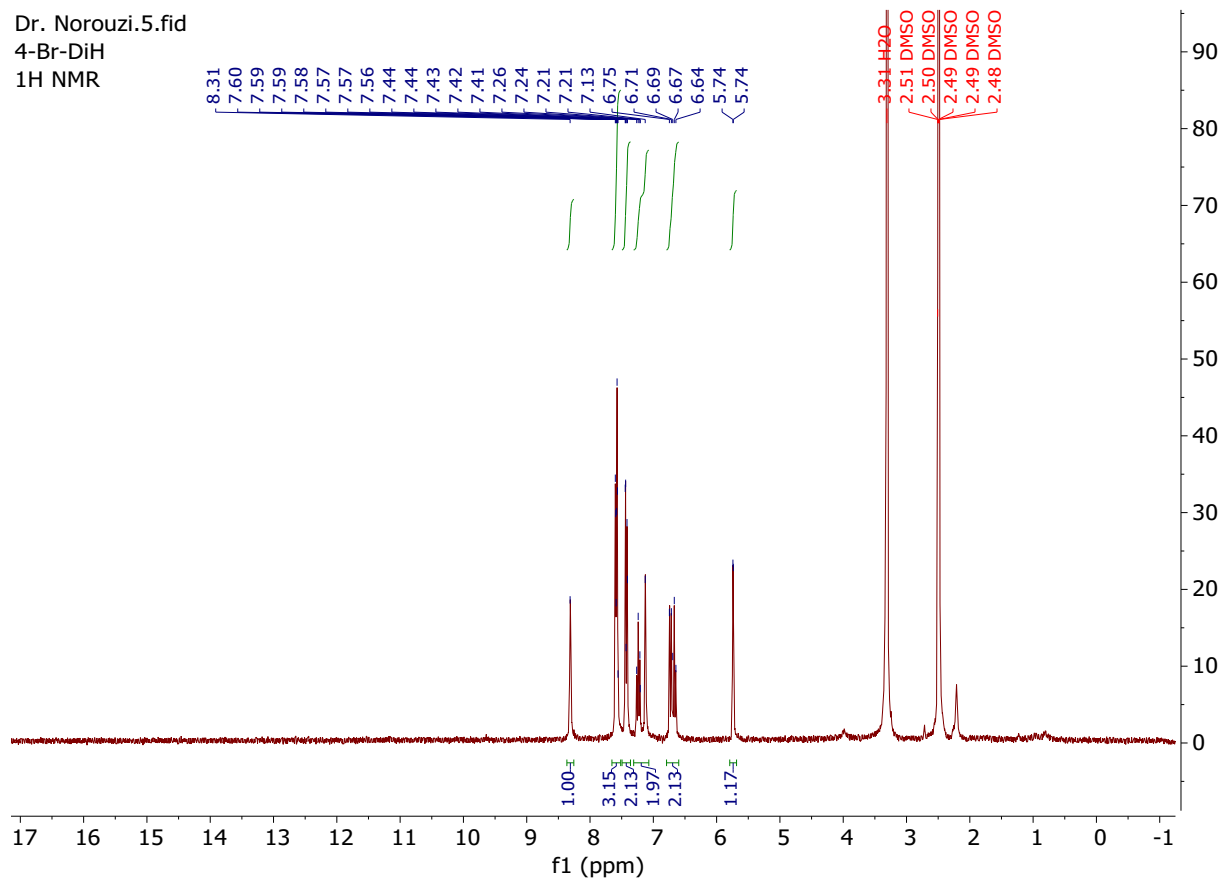

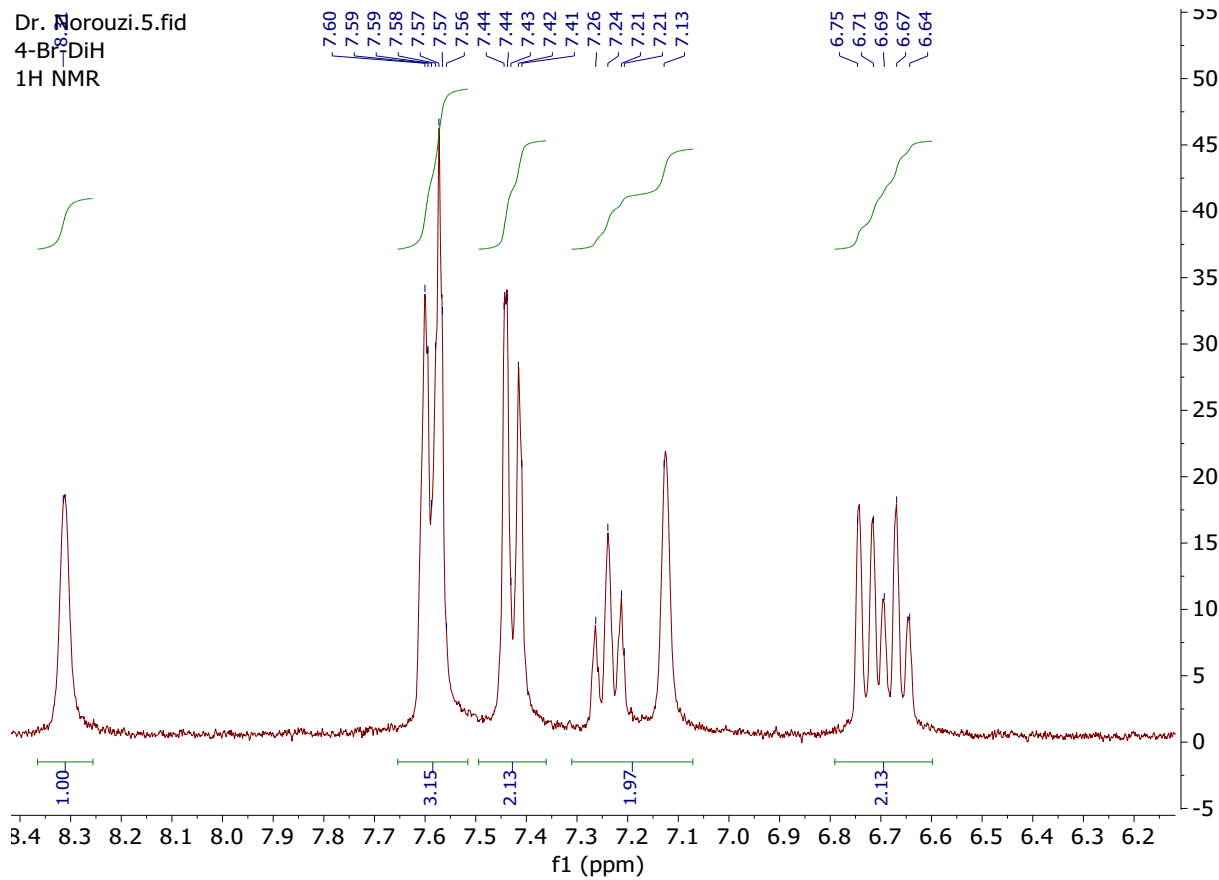

**Figure S4.** <sup>1</sup>H NMR spectrum of 2-(4-bromophenyl)-2,3-dihydro-1H-quinazolin-4-one

## 2-(5-Bromo-2-hydroxy-phenyl)-2,3-dihydro-1H-quinazolin-4-one

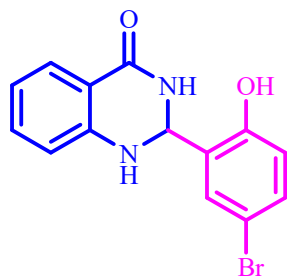

$^1\text{H}$  NMR (400 MHz,  $\text{DMSO-}d_6$ ):  $\delta$  10.22 (s, 1H), 7.99 (s, 1H), 7.63-7.60 (d,  $J=7.6$  Hz, 1H), 7.30-7.20 (m, 2H), 6.83-6.65 (m, 4H), 5.95 (s, 1H) ppm.

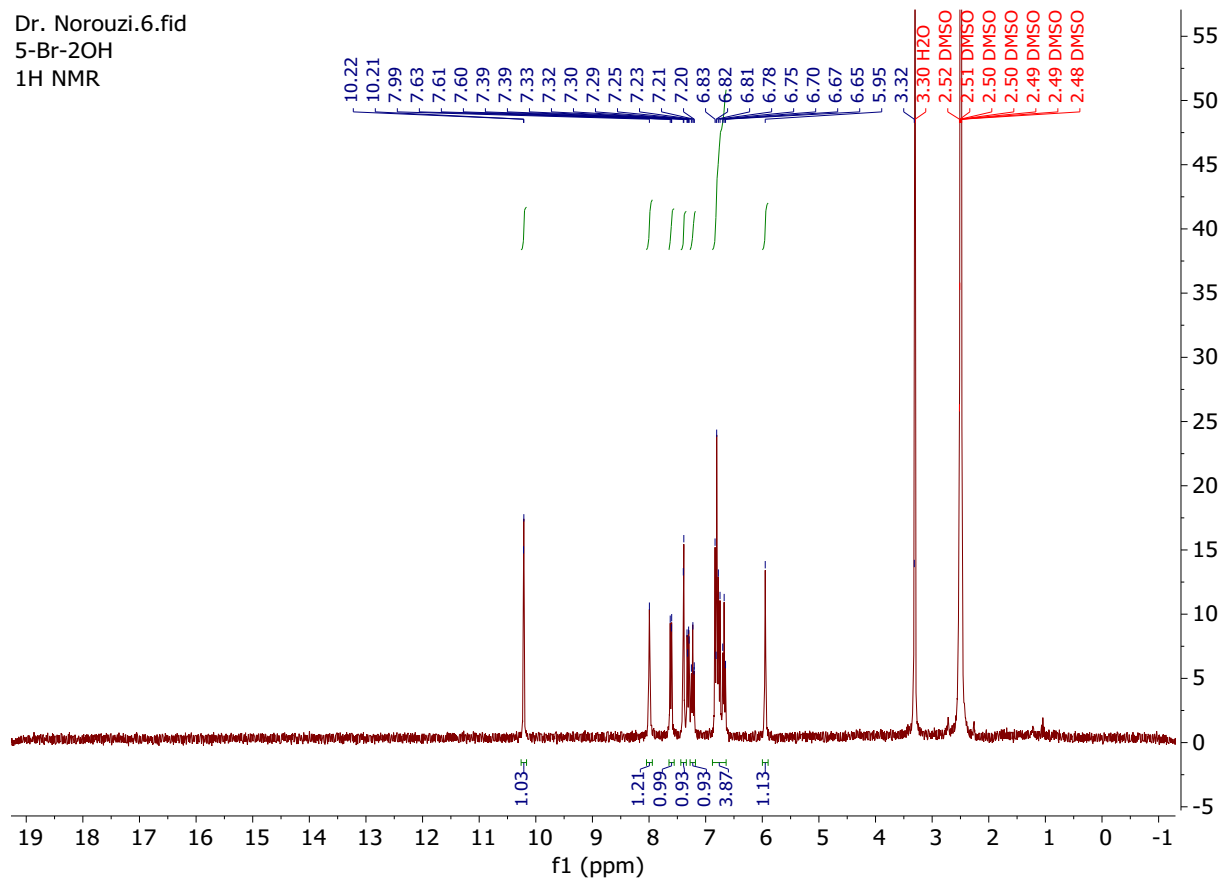

**Figure S5.**  $^1\text{H}$ NMR spectrum of 2-(5-Bromo-2-hydroxyphenyl)-2,3-dihydro-1H-quinazolin-4-one

## 2-(3,4-Dimethoxy-phenyl)-2,3-dihydro-1H-quinazolin-4-one

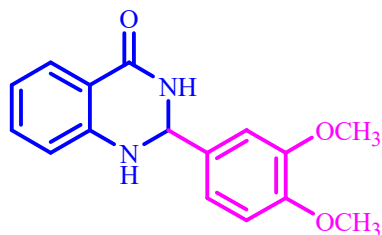

$^1\text{H}$  NMR (400 MHz,  $\text{DMSO-}d_6$ ):  $\delta$  8.12 (s, 1H), 7.62-7.59 (d,  $J=7.6$ , 1H), 7.26-7.21 (t,  $J=7.2$ , 1H), 7.20 (s, 1H), 7.01-6.92 (m, 3H), 6.73-6.76 (d,  $J=6.7$  Hz, 1H), 6.96-6.64 (t,  $J=6.7$  Hz, 1H), 5.68 (s, 1H), 3.75 (s, 6H) ppm.

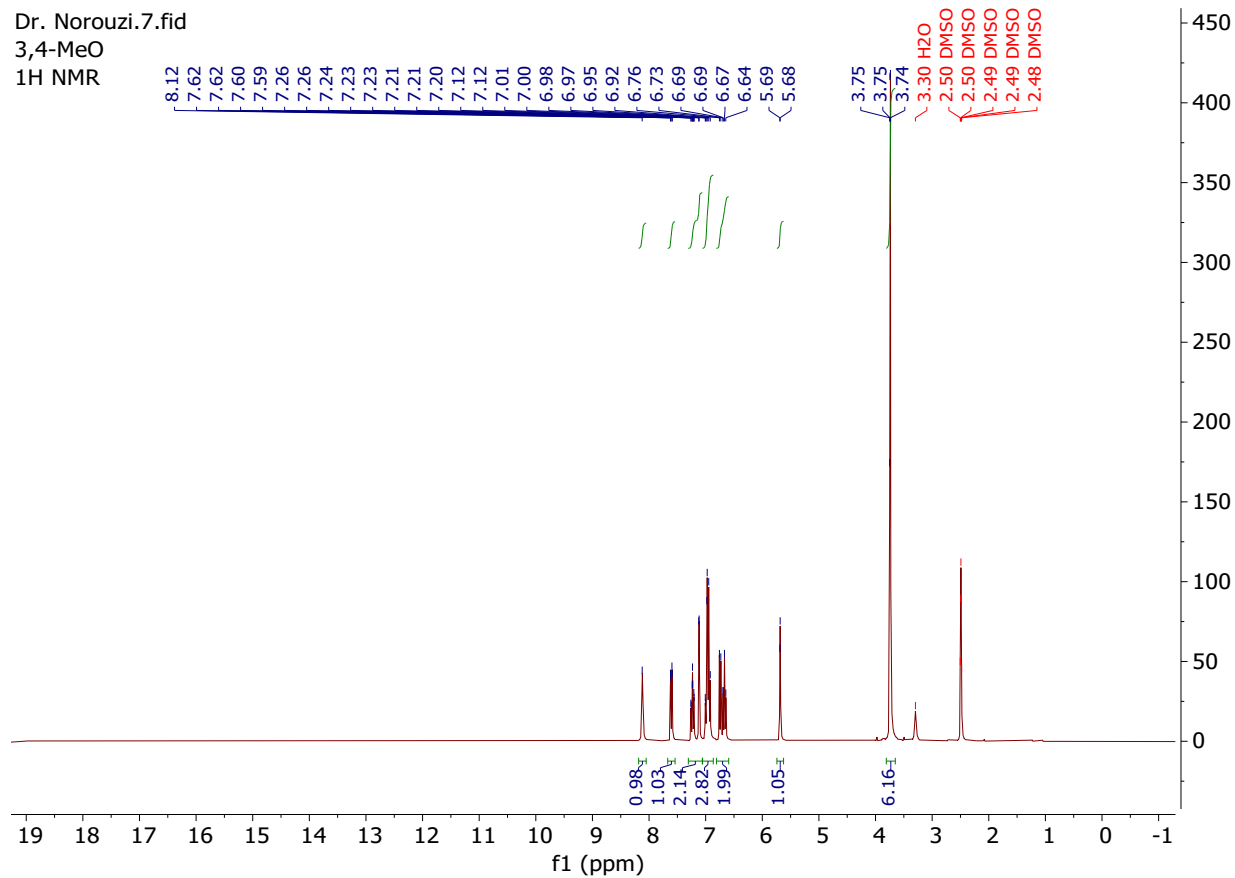



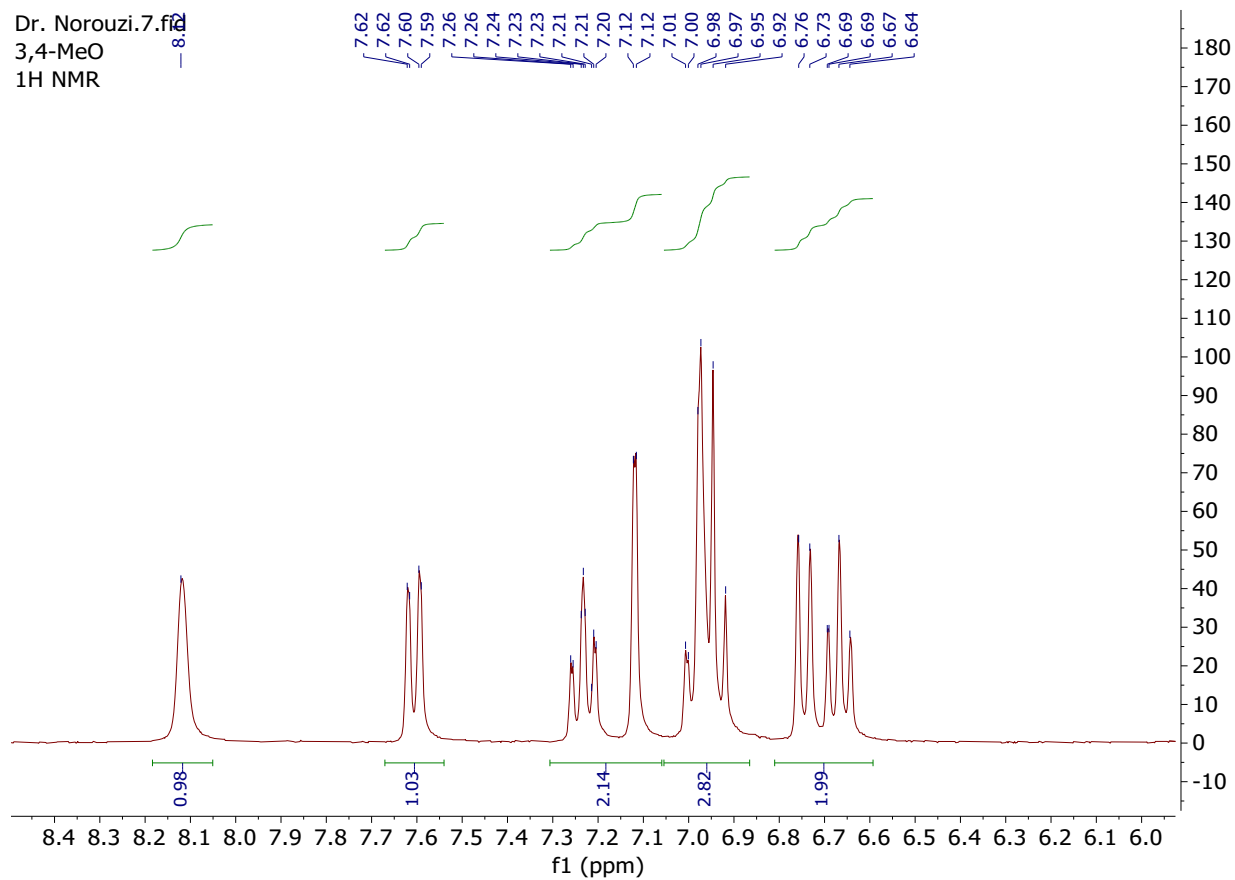

**Figure S6.**  $^1\text{H}$ NMR spectrum of 2-(3,4-Dimethoxy-phenyl)-2,3-dihydro-1H-quinazolin-4-one

## 2-Phenyl-2,3-dihydro-1H-quinazolin-4-one

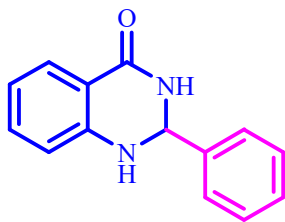

$^1\text{H}$  NMR (400 MHz, DMSO):  $\delta$  8.25 (s, 1H), 7.61-7.57 (d,  $J = 7.6$  Hz, 1H), 7.49-7.46 (d,  $J = 7.6$  Hz, 2H), 7.41-7.34 (m, 3H), 7.28-7.30 (t,  $J = 7.0$  Hz, 1H), 7.08 (s, 1H), 6.74-6.70 (d,  $J = 7.0$  Hz, 1H), 6.69-6.64 (t,  $J = 7.0$  Hz, 1H), 5.74 (s, 1H).

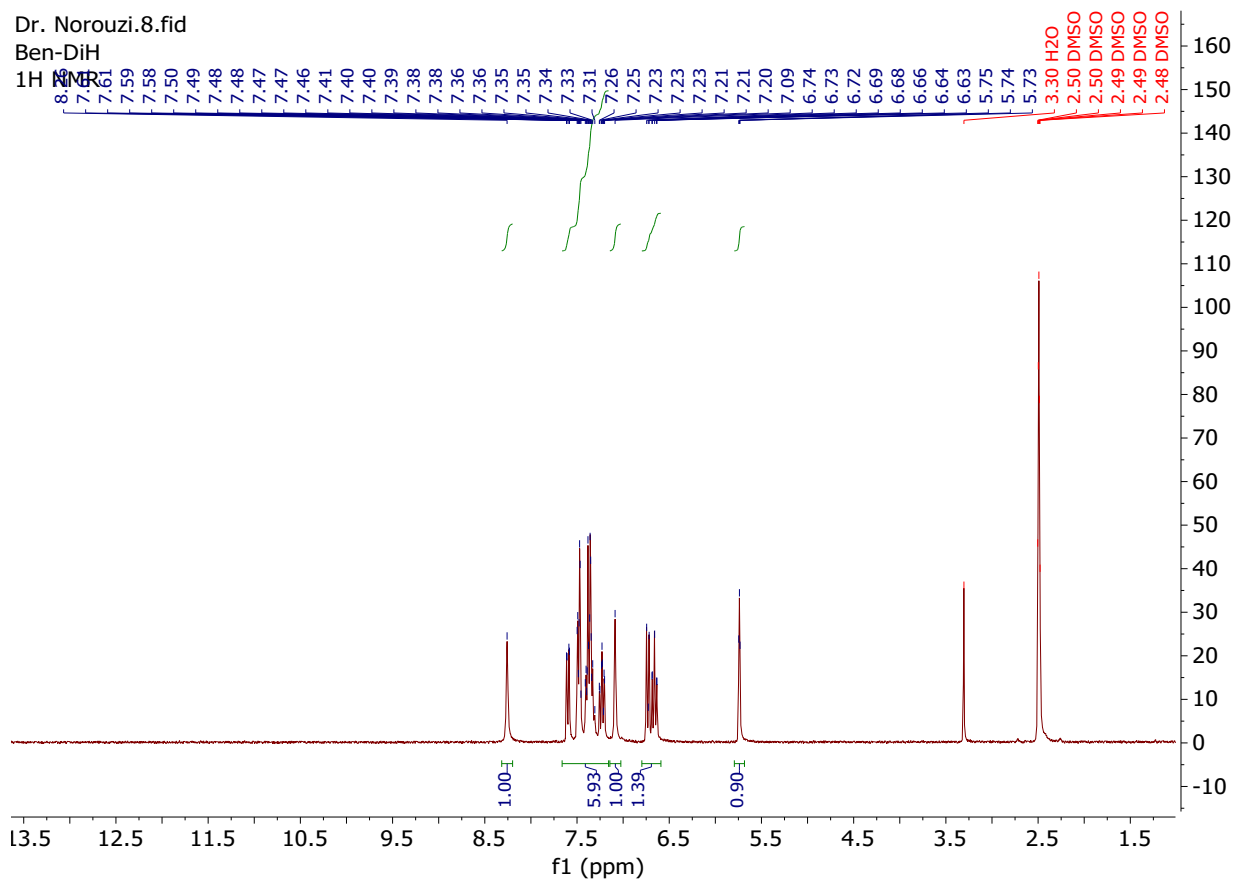

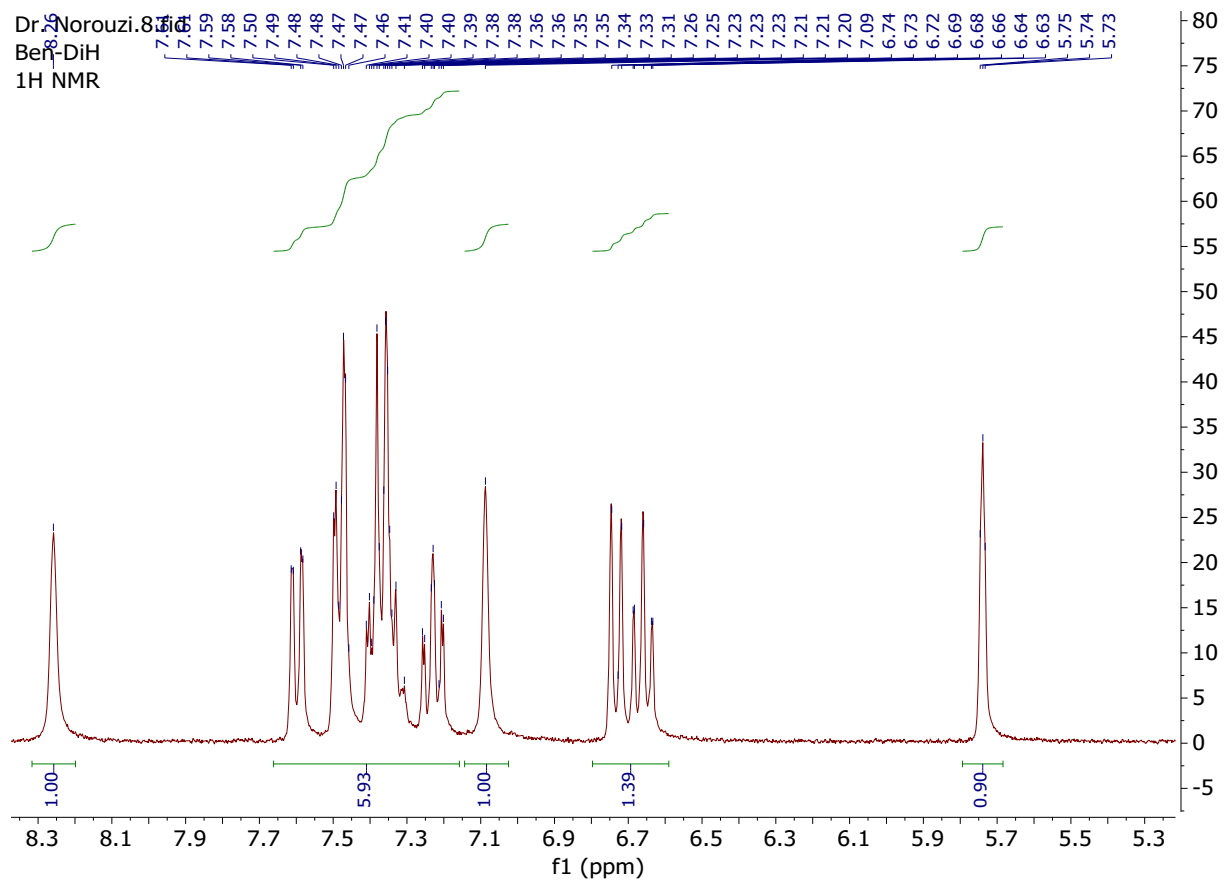

**Figure S7.**  $^1\text{H}$ NMR spectrum of 2-Phenyl-2,3-dihydro-1H-quinazolin-4-one

## 2-(4-Chloro-phenyl)-2,3-dihydro-1H-quinazolin-4-one

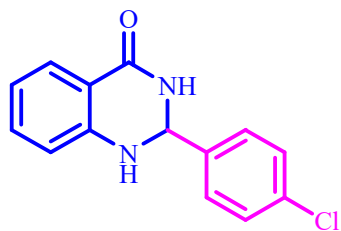

$^1\text{H NMR}$  (400 MHz,  $\text{DMSO-}d_6$ ):  $\delta$  8.31 (s, 1H), 7.62-7.55 (d,  $J = 7.1$  Hz, 1H), 7.52-7.40 (m, 4H), 7.26-7.20 (t, 1H), 7.12 (s, 1H), 6.75-6.70 (d,  $J = 7.0$ , 1H), 6.71-6.64 (t,  $J = 7.0$ , 1H), 5.75 (s, 1H) ppm.

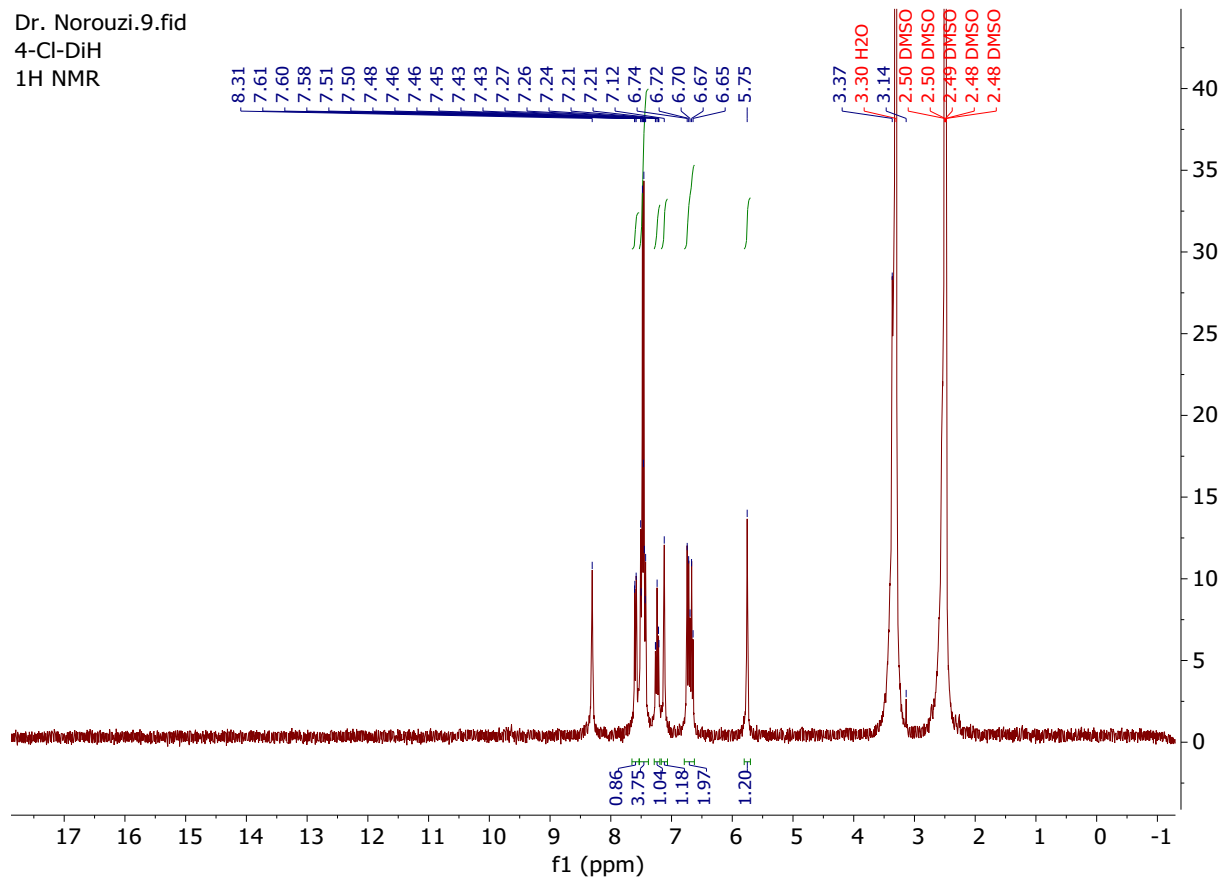

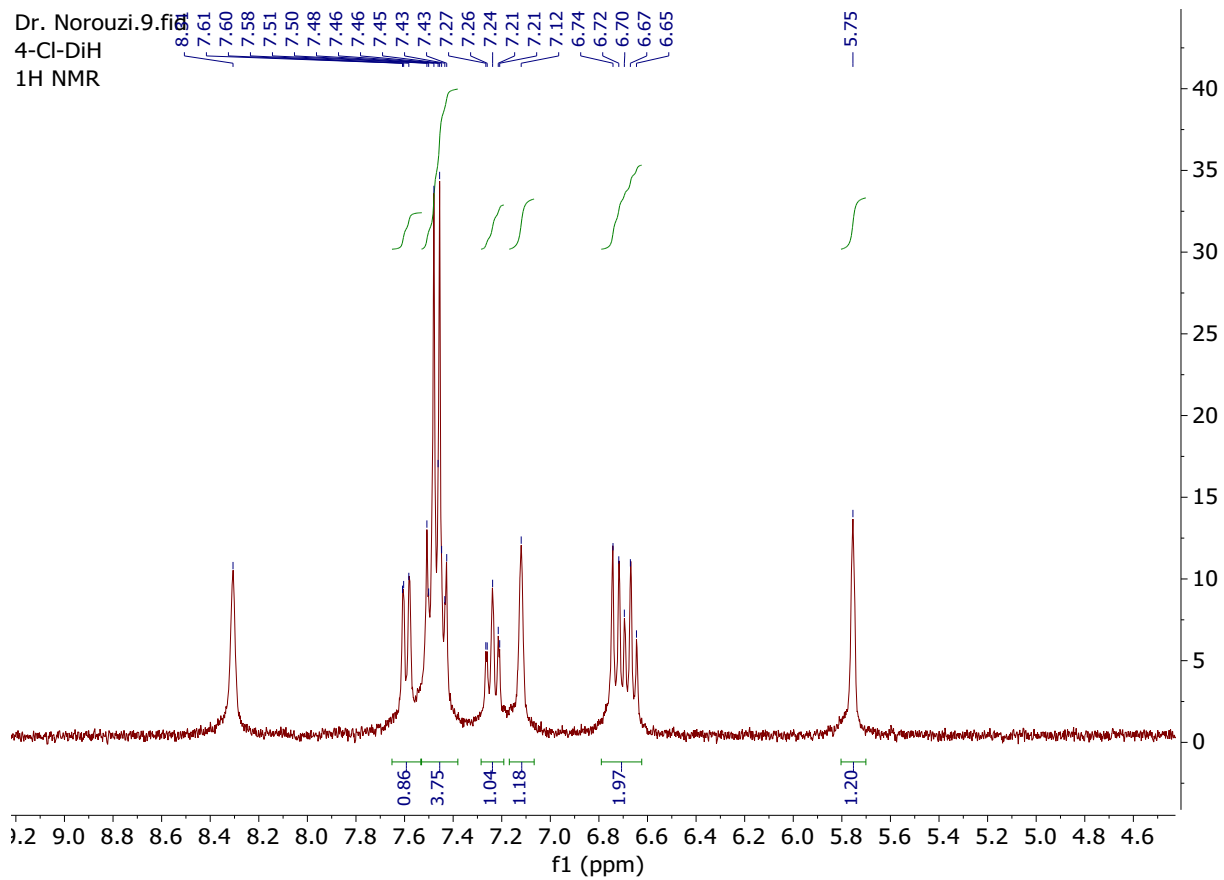

**Figure S8.**  $^1\text{H}$ NMR spectrum of 2-(4-Chloro-phenyl)-2,3-dihydro-1H-quinazolin-4-one
